# Supplementary material for: Moral Identity Predicts Adherence to COVID‐19 Mitigation Procedures Depending on Political Ideology: A Comparison Between the USA and New Zealand
Source: PubMed Central journal article supplement (PMC9349772; doi:10.1111/pops.12838), 2022-06-17

**Online Appendix**  
**Supplementary Materials**

**Restriction Support Items**

During the days of the coronavirus (COVID-19) pandemic, I have been ...

- In favor of closing all schools and universities
- In favor of closing all bars and restaurants
- In favor of closing all parks
- In favor of forbidding all public gatherings where many people are gathered at one place  
(sports and culture)
- In favor of forbidding all non-necessary travel

**Distancing Adherence Items**

During the days of the coronavirus (COVID-19) pandemic, I have been ...

- Staying at home as much as practically possible
- Visiting friends, family, or colleagues outside my home
- Keeping the number of grocery store visits at an absolute minimum
- Keeping physical distance from all other people outside my home
- Avoiding handshaking with people outside my home

**Hygiene Adherence Items**

During the days of the coronavirus (COVID-19) pandemic, I have been ...

- Washing my hands longer than usual
- Washing my hands (with soap) more thoroughly than usual
- Always washing my hands immediately after returning home
- Disinfecting frequently used objects, such as mobile phones and keys

- Sneezing and coughing into my upper sleeve

### **Moral Identity Items**

The items measuring moral identity are listed below. Items are denoted in parenthesis as “I” (internalization) and “S” (symbolization). Reverse coded items are labelled with “(R)”.

*“Listed below are some characteristics that might describe a person: caring, compassionate, fair, friendly, generous, helpful, hardworking, honest, kind. The person with these characteristics could be you or it could be someone else. For a moment, visualize in your mind the kind of person who has these characteristics. Imagine how that person would think, feel, and act. When you have a clear image of what this person would be like, answer the following questions.”*

- (I) It would make me feel good to be a person who has these characteristics.
- (I) Being someone who has these characteristics is an important part of who I am.
- (S) I often wear clothes that identify me as having these characteristics.
- (I) I would be ashamed to be a person who had these characteristics. (R)
- (S) The types of things I do in my spare time (e.g., hobbies) clearly identify me as having these characteristics
- (S) The kinds of books and magazines that I read identify me as having these characteristics.
- (I) Having these characteristics is not really important to me. (R)
- (S) The fact that I have these characteristics is communicated to others by my membership in certain organizations.
- (S) I am actively involved in activities that communicate to others that I have these characteristics.
- (I) I strongly desire to have these characteristics.

**Moral Circle**

On this page, we would like you to indicate the extent of your moral circle. By moral circle, we mean the circle of people or other entities for which you are concerned about right and wrong done toward them. Please use the following scale to select the extent of your moral circle:

- 1 - all of your immediate family
- 2 - all of your extended family
- 3 - all of your closest friends
- 4 - all of your friends (including distant ones)
- 5 - all of your acquaintances
- 6 - all people you have ever met
- 7 - all people in your country
- 8 - all people on your continent
- 9 - all people on all continents
- 10 - all mammals
- 11 - all amphibians, reptiles, mammals, fish, and birds
- 12 - all animals on earth, including paramecia and amoebae
- 13 - all animals in the universe, including alien lifeforms
- 14 - all living things in the universe, including plants and trees
- 15 - all natural things in the universe, including inert entities such as rocks
- 16 - all things in existence

Please select the number that represents the extent of your moral circle. Note that, in this scale, the number you select includes all the numbers below it as well. So, for example, if you select 10 (all mammals) you are also including number 1-9 (up to “all people on all continents”) in your moral circle.

### Supplementary Results

Initial testing revealed that for restrictions support, allowing intercepts to vary with country significantly improved the predictive power of the model,  $\chi^2(1) = 8290.99, p < .001$ .

Similarly, for distancing adherence, allowing intercepts to vary with country significantly improved the predictive power of the model,  $\chi^2(1) = 3951.04, p < .001$ .

Finally, for hygiene adherence, allowing intercepts to vary with country significantly improved the predictive power of the model,  $\chi^2(1) = 4677.74, p < .001$ . The country level residuals for the full models for each dependent variable are plotted below.

### Residual Plots

Figure S1

Residuals by country, predicting restrictions support

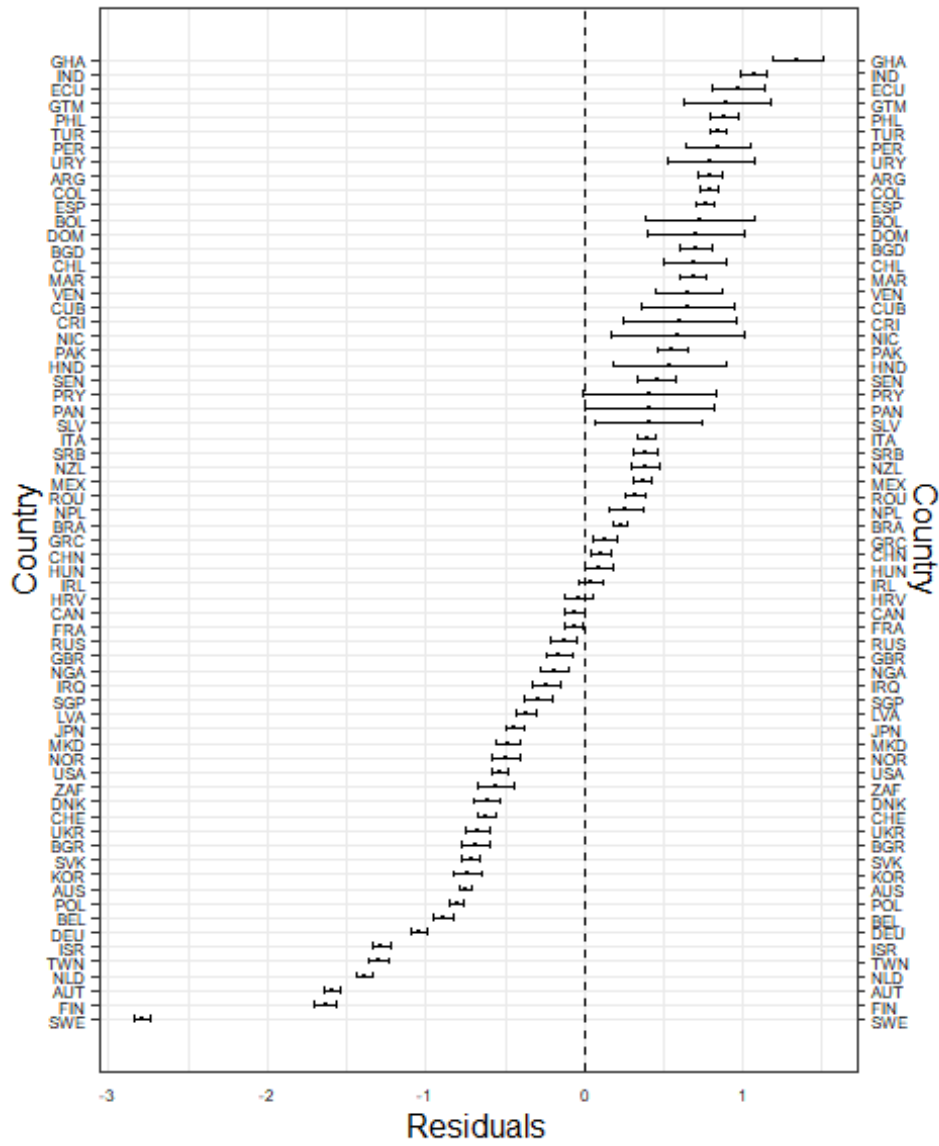

Figure S2

Residuals by country, predicting adherence to physical distancing measures

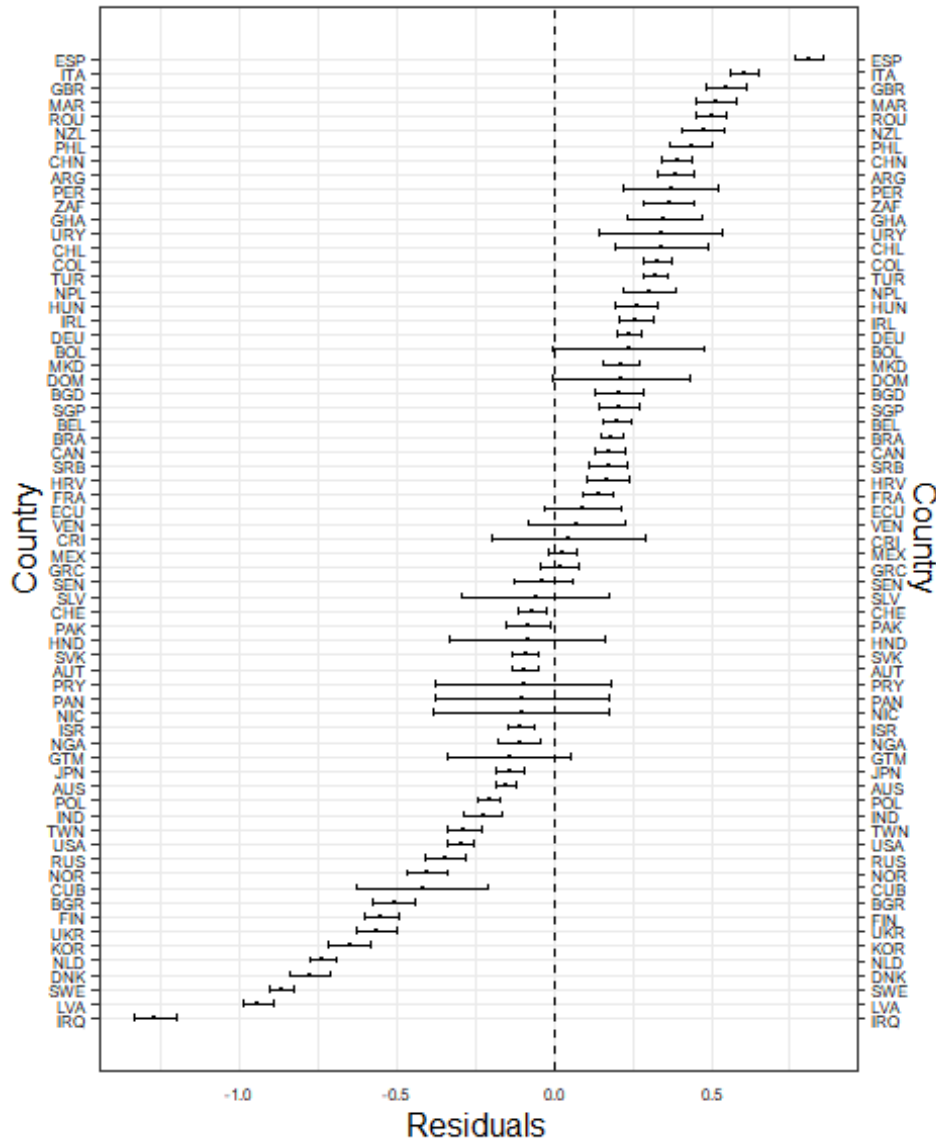

Figure S3

Residuals by country, predicting adherence to physical hygiene measures

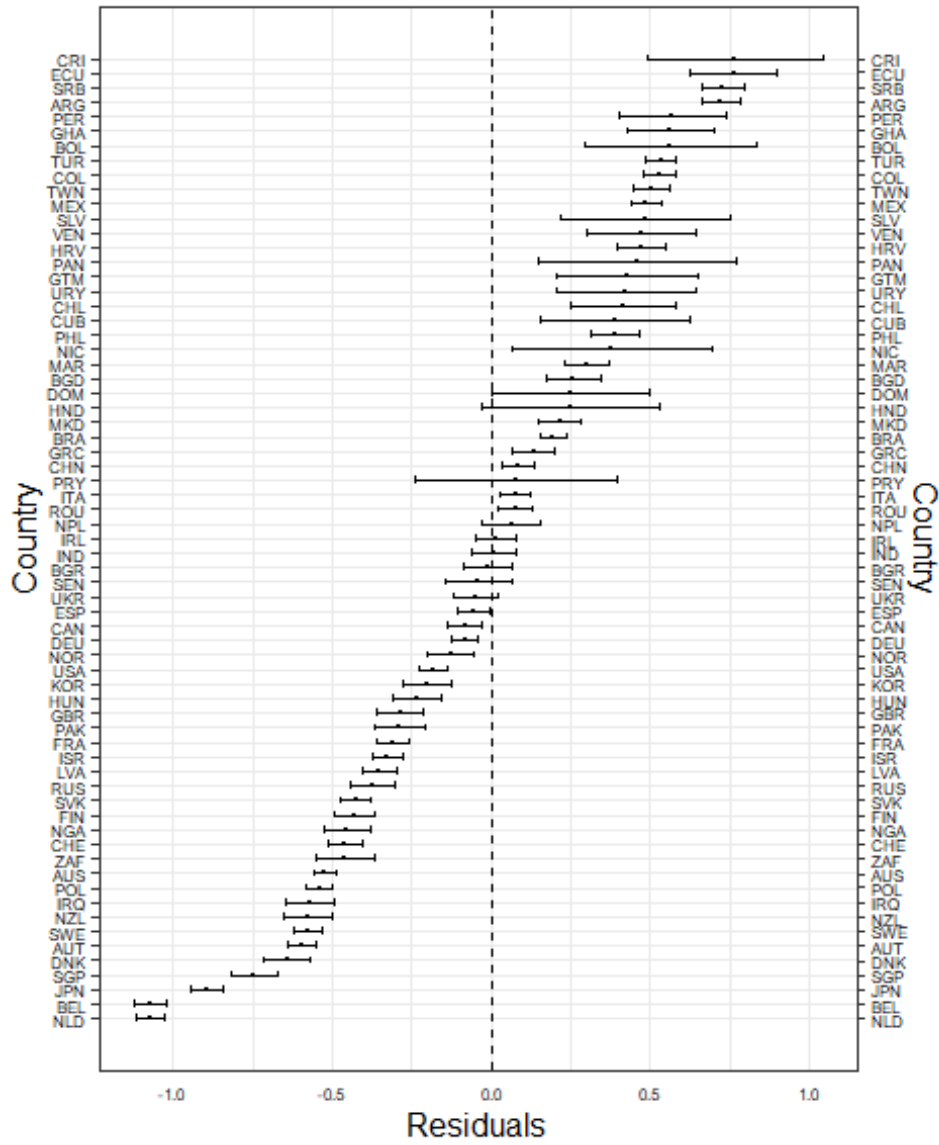

**Participant Characteristics****Table S1***Participant Characteristics (N = 1980)*

|                        | USA (N = 1471)      |           |                 | New Zealand (N = 509) |           |                |
|------------------------|---------------------|-----------|-----------------|-----------------------|-----------|----------------|
|                        | <i>M</i><br>(range) | <i>SD</i> | <i>N</i><br>(%) | <i>M</i><br>(range)   | <i>SD</i> | <i>N</i> (%)   |
| Male                   |                     |           | 755<br>(51.3%)  |                       |           | 253<br>(49.7%) |
| Female                 |                     |           | 710<br>(48.3%)  |                       |           | 255<br>(50.1%) |
| Other gender (missing) |                     |           | 4(2)            |                       |           | 1              |
| Age                    | 44.32<br>(18-86)    | 16.43     |                 | 45.78<br>(18-89)      | 17.63     |                |



## Correlations, Group Means, and Standard Deviations

Table S2

Correlations between all variables including covariates for the total sample

|                             | 1      | 2      | 3     | 4      | 5      | 6      | 7      | 8      | 9      | 10    | 11     | 12     | 13    | <i>M</i> | <i>SD</i> |
|-----------------------------|--------|--------|-------|--------|--------|--------|--------|--------|--------|-------|--------|--------|-------|----------|-----------|
| 1. Restrictions Support     | -      |        |       |        |        |        |        |        |        |       |        |        |       | 7.82     | 2.30      |
| 2. Distancing Adherence     | .55**  | -      |       |        |        |        |        |        |        |       |        |        |       | 8.13     | 1.77      |
| 3. Hygiene Adherence        | .41**  | .39**  | -     |        |        |        |        |        |        |       |        |        |       | 7.86     | 1.90      |
| 4. Age                      | .15**  | .30**  | .08** | -      |        |        |        |        |        |       |        |        |       | 44.70    | 16.76     |
| 5. Risk Perception          | .09**  | -.13** | .12** | -.20** | -      |        |        |        |        |       |        |        |       | 44.96    | 26.74     |
| 6. Narcissism Admiration    | .04    | -.21** | .17** | -.33** | .25**  | -      |        |        |        |       |        |        |       | 5.20     | 2.55      |
| 7. Narcissism Rivalry       | -.06*  | -.38** | -.04* | -.34** | .37**  | .59**  | -      |        |        |       |        |        |       | 3.80     | 2.64      |
| 8. Collective Narcissism    | .07*   | -.12** | .23** | -.08** | .16**  | .49**  | .40**  | -      |        |       |        |        |       | 5.53     | 2.57      |
| 9. Conspiracy Beliefs       | -.20** | -.38** | .01   | -.30** | .29**  | .47**  | .53**  | .47**  | -      |       |        |        |       | 3.81     | 3.10      |
| 10. National Identification | .23**  | .26**  | .32** | .24**  | .00    | .12**  | -.05*  | .35**  | .05*   | -     |        |        |       | 8.14     | 2.14      |
| 11. Moral Circle            | .15**  | .16**  | .10** | .10**  | .01    | -.05*  | -.10** | -.07*  | -.12** | .04   | -      |        |       | 8.92     | 5.21      |
| 12. Internalization         | .30**  | .53**  | .27** | .30**  | -.22** | -.24** | -.52** | -.20** | -.41** | .27** | .22**  | -      |       | 7.44     | 1.86      |
| 13. Symbolization           | .16**  | -.03   | .33** | -.17** | .21**  | .52**  | .32**  | .41**  | .36**  | .21** | .04*   | -.02   | -     | 5.89     | 2.10      |
| 14. Political Ideology      | -.10** | -.15** | .12** | -.10** | .16**  | .34**  | .32**  | .46**  | .44**  | .23** | -.10** | -.16** | .31** | 5.89     | 2.58      |

Note: \* = sig. at  $p < .05$ ; \*\* = sig. at  $p < .001$

**Table S3**

Correlations between all variables including covariates for the USA subsample

|                             | 1      | 2      | 3     | 4      | 5      | 6      | 7      | 8      | 9      | 10    | 11     | 12     | 13    | <i>M</i> | <i>SD</i> |
|-----------------------------|--------|--------|-------|--------|--------|--------|--------|--------|--------|-------|--------|--------|-------|----------|-----------|
| 1. Restrictions Support     | -      |        |       |        |        |        |        |        |        |       |        |        |       | 7.58     | 2.39      |
| 2. Distancing Adherence     | .54**  | -      |       |        |        |        |        |        |        |       |        |        |       | 7.89     | 1.81      |
| 3. Hygiene Adherence        | .48**  | .50**  | -     |        |        |        |        |        |        |       |        |        |       | 7.99     | 1.90      |
| 4. Age                      | .15**  | .32**  | .12** | -      |        |        |        |        |        |       |        |        |       | 44.32    | 16.43     |
| 5. Risk Perception          | .19**  | -.04   | .13** | -.19** | -      |        |        |        |        |       |        |        |       | 49.17    | 26.47     |
| 6. Narcissism Admiration    | .11**  | -.17** | .17** | -.35** | .24**  | -      |        |        |        |       |        |        |       | 5.42     | 2.60      |
| 7. Narcissism Rivalry       | -.02   | -.36** | -.05* | -.36** | .40**  | .60**  | -      |        |        |       |        |        |       | 3.94     | 2.76      |
| 8. Collective Narcissism    | .08*   | -.13** | .23** | -.07*  | .17**  | .52**  | .44**  | -      |        |       |        |        |       | 5.54     | 2.68      |
| 9. Conspiracy Beliefs       | -.17** | -.37** | -.02  | -.32** | .25**  | .49**  | .56**  | .51**  | -      |       |        |        |       | 4.09     | 3.13      |
| 10. National Identification | .23**  | .29**  | .37** | .26**  | .00    | .14**  | -.03   | .40**  | .07*   | -     |        |        |       | 8.13     | 2.13      |
| 11. Moral Circle            | .17**  | .19**  | .10** | .14**  | .00    | -.05*  | -.11** | -.10** | -.14** | .04   | -      |        |       | 8.94     | 5.19      |
| 12. Internalization         | .28**  | .55**  | .31** | .34**  | -.22** | -.24** | -.53** | -.22** | -.44** | .29** | .21**  | -      |       | 7.37     | 1.91      |
| 13. Symbolization           | .23**  | .03    | .33** | -.20** | .22**  | .54**  | .35**  | .43**  | .35**  | .22** | .04    | -.02   | -     | 6.07     | 2.13      |
| 14. Political Ideology      | -.07*  | -.12** | .14** | -.09** | .12**  | .35**  | .32**  | .54**  | .46**  | .30** | -.10** | -.14** | .33** | 6.11     | 2.69      |

Note: \* = sig. at  $p < .05$ ; \*\* = sig. at  $p < .001$

**Table S4**

Correlations between all variables including covariates for the New Zealand subsample

|                             | 1      | 2      | 3     | 4      | 5      | 6      | 7      | 8     | 9      | 10    | 11    | 12     | 13   | <i>M</i> | <i>SD</i> |
|-----------------------------|--------|--------|-------|--------|--------|--------|--------|-------|--------|-------|-------|--------|------|----------|-----------|
| 1. Restrictions Support     | -      |        |       |        |        |        |        |       |        |       |       |        |      | 8.53     | 1.84      |
| 2. Distancing Adherence     | .50**  | -      |       |        |        |        |        |       |        |       |       |        |      | 8.84     | 1.45      |
| 3. Hygiene Adherence        | .28**  | .20**  | -     |        |        |        |        |       |        |       |       |        |      | 7.50     | 1.85      |
| 4. Age                      | .12*   | .26**  | -.02  | -      |        |        |        |       |        |       |       |        |      | 45.78    | 17.63     |
| 5. Risk Perception          | -.05   | -.18** | .00   | -.21** | -      |        |        |       |        |       |       |        |      | 32.80    | 23.60     |
| 6. Narcissism Admiration    | -.08   | -.24** | .12*  | -.28** | .12*   | -      |        |       |        |       |       |        |      | 4.56     | 2.29      |
| 7. Narcissism Rivalry       | -.16** | -.41** | -.07  | -.27** | .21**  | .56**  | -      |       |        |       |       |        |      | 3.38     | 2.22      |
| 8. Collective Narcissism    | .07    | -.09*  | .22** | -.13*  | .14*   | .40**  | .25**  | -     |        |       |       |        |      | 5.48     | 2.24      |
| 9. Conspiracy Beliefs       | -.24** | -.31** | .06   | -.24** | .31**  | .33**  | .35**  | .36** | -      |       |       |        |      | 2.99     | 2.85      |
| 10. National Identification | .23**  | .21**  | .19** | .17**  | -.02   | .06    | -.10*  | .20** | -.01   | -     |       |        |      | 8.17     | 2.17      |
| 11. Moral Circle            | .11*   | .08    | .09   | .00    | .01    | -.06   | -.07   | .02   | -.07   | .06   | -     |        |      | 8.85     | 5.27      |
| 12. Internalization         | .33**  | .45**  | .18** | .18**  | -.17** | -.21** | -.47** | -.12* | -.26** | .23** | .24** | -      |      | 7.64     | 1.70      |
| 13. Symbolization           | .05    | -.10*  | .30** | -.09*  | .05    | .40**  | .16**  | .37** | .33**  | .20** | .05   | .04    | -    | 5.37     | 1.91      |
| 14. Political Ideology      | -.10*  | -.11*  | -.01  | -.10*  | .14*   | .25**  | .27**  | .14*  | .27**  | .02   | -.11* | -.22** | .14* | 5.23     | 2.12      |

Note: \* = sig. at  $p < .05$ ; \*\* = sig. at  $p < .001$

**Table S5**

Means Standard Deviations and Differences between the Subsamples

|                                | USA      |           | NZL      |           | <i>t</i> | <i>df</i> | <i>p</i> | <i>d</i> |
|--------------------------------|----------|-----------|----------|-----------|----------|-----------|----------|----------|
|                                | <i>M</i> | <i>SD</i> | <i>M</i> | <i>SD</i> |          |           |          |          |
| Restrictions Support           | 7.58     | 2.39      | 8.53     | 1.84      | 9.22     | 1138.13   | < .001** | 0.42     |
| Distancing Adherence           | 7.89     | 1.81      | 8.84     | 1.45      | 11.85    | 1092.8    | < .001** | 0.55     |
| Hygiene Adherence              | 7.99     | 1.9       | 7.5      | 1.85      | -5.11    | 903.28    | < .001** | 0.26     |
| Age                            | 44.32    | 16.43     | 45.78    | 17.63     | 1.63     | 834.07    | .103     | 0.09     |
| Risk Perception                | 49.17    | 26.47     | 32.8     | 23.6      | -13.05   | 980.39    | < .001** | 0.64     |
| Narcissism Admiration          | 5.42     | 2.6       | 4.56     | 2.29      | -7.04    | 992.51    | < .001** | 0.34     |
| Narcissism Rivalry             | 3.94     | 2.76      | 3.38     | 2.22      | -4.62    | 1085.6    | < .001** | 0.21     |
| Conspiracy Beliefs             | 4.09     | 3.13      | 2.99     | 2.85      | -7.27    | 961.03    | < .001** | 0.36     |
| National Identification        | 8.13     | 2.13      | 8.17     | 2.17      | 0.37     | 866.61    | .709     | 0.02     |
| Moral Circle                   | 8.94     | 5.19      | 8.85     | 5.27      | -0.35    | 871.89    | .727     | 0.02     |
| Moral Identity Internalization | 7.37     | 1.91      | 7.64     | 1.7       | 3.02     | 982.03    | .003*    | 0.15     |
| Moral Identity Symbolization   | 6.07     | 2.13      | 5.37     | 1.91      | -6.84    | 980.43    | < .001** | 0.33     |
| Political Ideology             | 6.11     | 2.69      | 5.23     | 2.12      | -7.53    | 1105.91   | < .001** | 0.35     |

Note: NZL = New Zealand; \* = sig. at  $p < .05$ ; \*\* = sig. at  $p < .001$

**Table S6**

Means Standard Deviations and Differences depending on Gender

|                          | Female   |           | Male     |           | Other    |           | <i>F</i> | <i>df</i> | <i>p</i> | $\eta_p^2$ |
|--------------------------|----------|-----------|----------|-----------|----------|-----------|----------|-----------|----------|------------|
|                          | <i>M</i> | <i>SD</i> | <i>M</i> | <i>SD</i> | <i>M</i> | <i>SD</i> |          |           |          |            |
| Restrictions Support     | 7.67     | 2.36      | 7.97     | 2.23      | 7.64     | 1.73      | 4.18     | 2, 1975   | .015*    | .004       |
| Distancing Adherence     | 7.88     | 1.76      | 8.38     | 1.75      | 8.12     | 2.29      | 19.68    | 2, 1974   | < .001** | .020       |
| Hygiene Adherence        | 7.68     | 1.95      | 8.04     | 1.82      | 6.08     | 3.00      | 11.39    | 2, 1974   | < .001** | .011       |
| Age                      | 45.53    | 16.42     | 43.96    | 17.04     | 33.2     | 14.77     | 3.33     | 2, 1972   | .036*    | .003       |
| Risk Perception          | 44.24    | 28.52     | 45.67    | 24.89     | 48       | 31.74     | 0.74     | 2, 1972   | .477     | < .001     |
| Narcissism Admiration    | 5.64     | 2.57      | 4.78     | 2.45      | 4.13     | 3.13      | 29.59    | 2, 1973   | < .001** | .029       |
| Narcissism Rivalry       | 4.35     | 2.71      | 3.27     | 2.47      | 3.67     | 2.39      | 43.38    | 2, 1972   | < .001** | .042       |
| Conspiracy Beliefs       | 4.15     | 3.23      | 3.48     | 2.93      | 3.00     | 2.90      | 11.56    | 2, 1972   | < .001** | .012       |
| National Identification  | 8.20     | 2.11      | 8.10     | 2.17      | 7.10     | 2.53      | 1.09     | 2, 1973   | .337     | .001       |
| Moral Circle             | 8.36     | 5.09      | 9.47     | 5.27      | 6.00     | 3.74      | 11.97    | 2, 1970   | < .001** | .012       |
| Moral ID Internalization | 7.11     | 1.78      | 7.75     | 1.87      | 7.24     | 2.21      | 30.27    | 2, 1967   | < .001** | .030       |
| Moral ID Symbolization   | 6.07     | 2.19      | 5.72     | 1.99      | 4.28     | 1.29      | 8.32     | 2, 1972   | < .001** | .008       |
| Political Ideology       | 6.24     | 2.63      | 5.55     | 2.48      | 5.6      | 3.51      | 17.74    | 2, 1966   | < .001** | .018       |

Note: \* = sig. at  $p < .05$ ; \*\* = sig. at  $p < .001$

**Full Regression Tables*****Restrictions Support*****Table S7**

Model 1: Full regression model predicting Restrictions Support (without Country);  $R^2 = 0.25$ ,  $S.E. = 0.87$ , adjusted  $R^2 = 0.24$ ,  $F(17, 1932) = 37.28$ ,  $p < .001$ .

|                                      | <b><i>b</i></b> | <b><i>S.E.</i></b> | <b>95% CI</b>  | <b><i>t</i>(1932)</b> | <b><i>p</i></b> |
|--------------------------------------|-----------------|--------------------|----------------|-----------------------|-----------------|
| Intercept                            | -0.27           | 0.07               | [-0.41, -0.14] | -3.89                 | < .001          |
| Age                                  | 0.00            | 0.00               | [0.00, 0.01]   | 2.92                  | .004            |
| Sex - Male/Female                    | 0.10            | 0.04               | [0.01, 0.18]   | 2.28                  | .022            |
| Sex - Other/Female                   | 0.24            | 0.39               | [-0.53, 1.01]  | 0.61                  | .542            |
| Risk Perception                      | 0.12            | 0.02               | [0.08, 0.16]   | 5.52                  | < .001          |
| Narcissism Admiration                | 0.05            | 0.03               | [-0.01, 0.10]  | 1.58                  | .114            |
| Narcissism Rivalry                   | 0.06            | 0.03               | [0.00, 0.12]   | 2.03                  | .043            |
| Collective Narcissism                | 0.14            | 0.03               | [0.08, 0.19]   | 5.05                  | < .001          |
| Conspiracy Beliefs                   | -0.26           | 0.03               | [-0.32, -0.21] | -9.87                 | < .001          |
| National Identification              | 0.10            | 0.02               | [0.05, 0.14]   | 4.19                  | < .001          |
| Moral Circle                         | 0.05            | 0.02               | [0.01, 0.09]   | 2.53                  | .012            |
| Moral Identity Internalization       | 0.22            | 0.03               | [0.16, 0.27]   | 8.29                  | < .001          |
| Moral Identity Symbolization         | 0.14            | 0.02               | [0.10, 0.19]   | 5.88                  | < .001          |
| Political Ideology                   | -0.12           | 0.02               | [-0.17, -0.08] | -5.20                 | < .001          |
| Moral Circle × Internalization       | 0.00            | 0.02               | [-0.05, 0.04]  | -0.22                 | .824            |
| Moral Circle × Symbolization         | 0.03            | 0.02               | [0.00, 0.07]   | 1.74                  | .081            |
| Internalization × Political Ideology | -0.12           | 0.02               | [-0.16, -0.08] | -5.80                 | < .001          |
| Symbolization × Political Ideology   | 0.10            | 0.02               | [0.06, 0.13]   | 5.33                  | < .001          |

*Note: Internalization = Moral Identity Internalization; Symbolization = Moral Identity Symbolization*

**Table S8**

Model 2: Full regression model predicting Restrictions Support (with Country included a

variable);  $R^2 = 0.30$ ,  $S.E. = 0.84$ , adjusted  $R^2 = 0.29$ ,  $F(35, 1914) = 23.67$ ,  $p < .001$ .

|                                         | <b>b</b> | <b>S.E.</b> | <b>95% CI</b>  | <b>t(1914)</b> | <b>p</b> |
|-----------------------------------------|----------|-------------|----------------|----------------|----------|
| Intercept                               | 0.05     | 0.12        | [-0.18, 0.29]  | 0.45           | .654     |
| Country                                 | -0.53    | 0.15        | [-0.82, -0.24] | -3.59          | < .001   |
| Age                                     | 0.00     | 0.00        | [0.00, 0.01]   | 0.77           | .443     |
| Sex - Male/Female                       | 0.23     | 0.08        | [0.07, 0.39]   | 2.81           | .005     |
| Sex - Other/Female                      | 0.41     | 0.86        | [-1.28, 2.10]  | 0.48           | .634     |
| Risk Perception                         | 0.02     | 0.05        | [-0.07, 0.12]  | 0.52           | .601     |
| Narcissism Admiration                   | -0.03    | 0.06        | [-0.15, 0.08]  | -0.60          | .549     |
| Narcissism Rivalry                      | 0.07     | 0.06        | [-0.05, 0.20]  | 1.13           | .257     |
| Collective Narcissism                   | 0.13     | 0.05        | [0.03, 0.23]   | 2.47           | .013     |
| Conspiracy Beliefs                      | -0.22    | 0.05        | [-0.32, -0.13] | -4.49          | < .001   |
| National Identification                 | 0.10     | 0.04        | [0.02, 0.18]   | 2.39           | .017     |
| Moral Circle                            | 0.00     | 0.04        | [-0.08, 0.08]  | 0.09           | .929     |
| Moral Identity Internalization          | 0.21     | 0.05        | [0.10, 0.31]   | 3.97           | < .001   |
| Moral Identity Symbolization            | 0.06     | 0.05        | [-0.04, 0.15]  | 1.10           | .270     |
| Political Ideology                      | -0.02    | 0.05        | [-0.12, 0.09]  | -0.29          | .769     |
| Moral Circle × Internalization          | -0.01    | 0.04        | [-0.10, 0.07]  | -0.29          | .772     |
| Moral Circle × Symbolization            | 0.00     | 0.04        | [-0.08, 0.08]  | 0.08           | .935     |
| Internalization × Political Ideology    | 0.03     | 0.05        | [-0.07, 0.13]  | 0.51           | .608     |
| Symbolization × Political Ideology      | 0.05     | 0.05        | [-0.04, 0.14]  | 1.02           | .306     |
| Country × Age                           | 0.00     | 0.00        | [0.00, 0.01]   | 1.38           | .169     |
| Country × Sex - Male/Female             | -0.15    | 0.09        | [-0.33, 0.04]  | -1.59          | .113     |
| Country × Sex - Other/Female            | -0.04    | 0.96        | [-1.93, 1.84]  | -0.05          | .963     |
| Country × Risk perception               | 0.18     | 0.05        | [0.08, 0.28]   | 3.39           | .001     |
| Country × Narcissism admiration         | 0.13     | 0.07        | [0.00, 0.26]   | 1.96           | .051     |
| Country × Narcissism rivalry            | -0.05    | 0.07        | [-0.19, 0.09]  | -0.64          | .521     |
| Country × Collective narcissism         | -0.03    | 0.06        | [-0.14, 0.09]  | -0.43          | .665     |
| Country × Conspiracy                    | -0.01    | 0.06        | [-0.12, 0.11]  | -0.13          | .899     |
| Country × National Identification       | 0.00     | 0.05        | [-0.10, 0.10]  | 0.00           | .996     |
| Country × Moral Circle                  | 0.06     | 0.05        | [-0.03, 0.15]  | 1.36           | .174     |
| Country × Internalization               | 0.02     | 0.06        | [-0.10, 0.13]  | 0.27           | .791     |
| Country × Symbolization                 | 0.13     | 0.06        | [0.02, 0.24]   | 2.26           | .024     |
| Country × Political Ideology            | -0.12    | 0.06        | [-0.23, -0.01] | -2.06          | .039     |
| Country × M. Circle × Internalization   | 0.02     | 0.05        | [-0.08, 0.11]  | 0.33           | .739     |
| Country × M. Circle × Symbolization     | 0.03     | 0.05        | [-0.06, 0.12]  | 0.57           | .566     |
| Country × Internalization × P. Ideology | -0.15    | 0.06        | [-0.26, -0.04] | -2.69          | .007     |
| Country × Symbolization × P. Ideology   | 0.06     | 0.05        | [-0.03, 0.16]  | 1.28           | .202     |

*Note: Internalization = Moral Identity Internalization; Symbolization = Moral Identity*

*Symbolization; M. Circle = Moral Circle; P. Ideology = Political Ideology*

**Figure S4**

The relationship between political ideology and internalization in predicting restrictions support for the total sample.

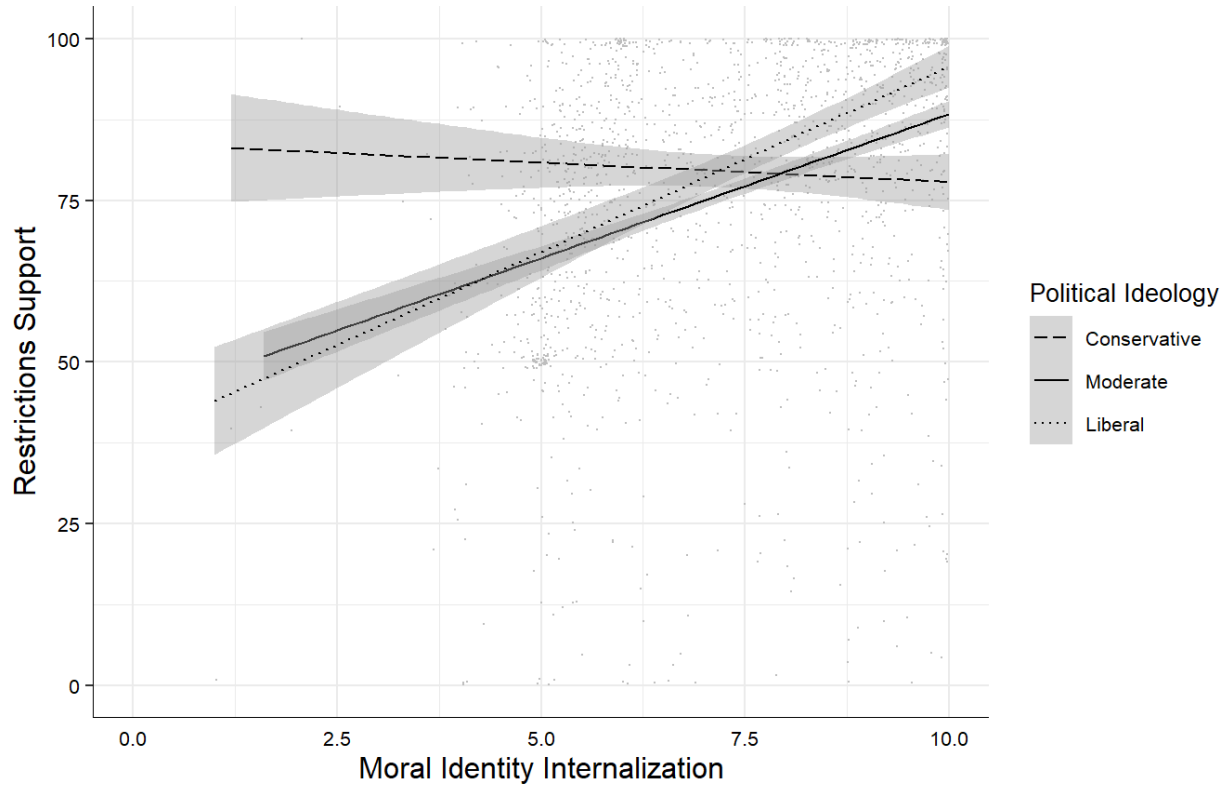



**Figure S5**

The relationship between political ideology and symbolization in predicting restrictions support for the total sample.

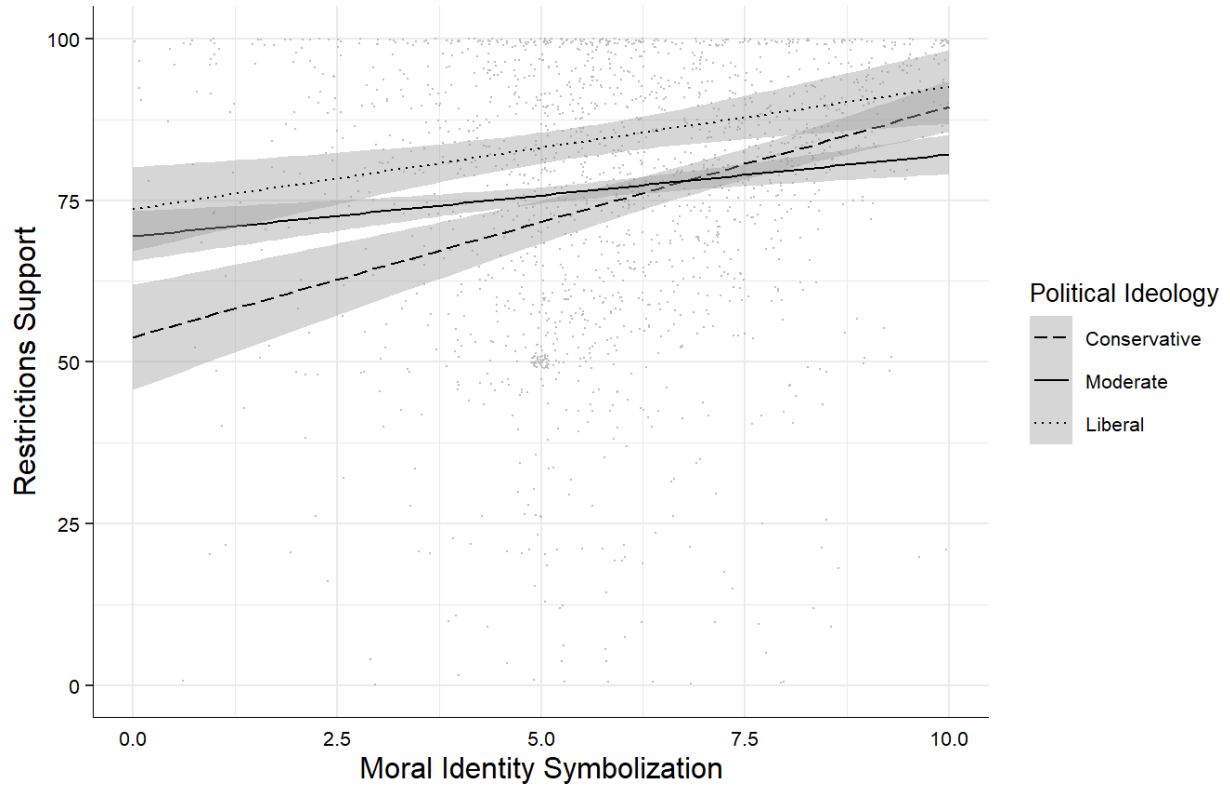

**Table S9**

Model 3: Predictors of Restrictions Support in USA subsample;  $R^2 = 0.31$ ,  $S.E. = 0.83$ , adjusted  $R^2 = 0.3$ ,  $F(17, 1429) = 37.46$ ,  $p < .001$ .

|                                      | <b><i>b</i></b> | <b><i>S.E.</i></b> | <b>95% CI</b>  | <b><i>t</i>(1430)</b> | <b><i>p</i></b> |
|--------------------------------------|-----------------|--------------------|----------------|-----------------------|-----------------|
| Intercept                            | -0.48           | 0.09               | [-0.65, -0.31] | -5.46                 | < .001          |
| Age                                  | 0.01            | 0.00               | [0.00, 0.01]   | 3.40                  | .001            |
| Sex - Male/Female                    | 0.08            | 0.05               | [-0.02, 0.18]  | 1.63                  | .104            |
| Sex - Other/Female                   | 0.37            | 0.44               | [-0.50, 1.23]  | 0.83                  | .408            |
| Risk Perception                      | 0.20            | 0.03               | [0.15, 0.26]   | 7.80                  | < .001          |
| Narcissism Admiration                | 0.10            | 0.03               | [0.03, 0.16]   | 2.84                  | .005            |
| Narcissism Rivalry                   | 0.03            | 0.03               | [-0.04, 0.09]  | 0.76                  | .449            |
| Collective Narcissism                | 0.10            | 0.03               | [0.04, 0.17]   | 3.08                  | .002            |
| Conspiracy Beliefs                   | -0.23           | 0.03               | [-0.30, -0.17] | -7.21                 | < .001          |
| National Identification              | 0.10            | 0.03               | [0.04, 0.15]   | 3.33                  | .001            |
| Moral Circle                         | 0.07            | 0.02               | [0.02, 0.11]   | 2.75                  | .006            |
| Moral Identity Internalization       | 0.22            | 0.03               | [0.16, 0.28]   | 7.26                  | < .001          |
| Moral Identity Symbolization         | 0.18            | 0.03               | [0.13, 0.24]   | 6.37                  | < .001          |
| Political Ideology                   | -0.14           | 0.03               | [-0.19, -0.08] | -4.83                 | < .001          |
| Moral Circle × Internalization       | 0.00            | 0.02               | [-0.04, 0.05]  | 0.16                  | .875            |
| Moral Circle × Symbolization         | 0.03            | 0.02               | [-0.01, 0.07]  | 1.37                  | .171            |
| Internalization × Political Ideology | -0.12           | 0.02               | [-0.17, -0.08] | -5.46                 | < .001          |
| Symbolization × Political Ideology   | 0.11            | 0.02               | [0.07, 0.15]   | 5.47                  | < .001          |

*Note: Internalization = Moral Identity Internalization; Symbolization = Moral Identity Symbolization*

**Table S10**

Model 4: Predictors of Restrictions Support in New Zealand subsample;  $R^2 = 0.21$ ,  $S.E. = 0.72$ , adjusted  $R^2 = 0.18$ ,  $F(17, 484) = 7.52$ ,  $p < .001$ .

|                                      | <b><i>b</i></b> | <b><i>S.E.</i></b> | <b>95% CI</b>  | <b><i>t</i>(484)</b> | <b><i>p</i></b> |
|--------------------------------------|-----------------|--------------------|----------------|----------------------|-----------------|
| Intercept                            | 0.05            | 0.10               | [-0.15, 0.26]  | 0.52                 | .602            |
| Age                                  | 0.00            | 0.00               | [0.00, 0.01]   | 0.90                 | .371            |
| Sex - Male/Female                    | 0.23            | 0.07               | [0.09, 0.36]   | 3.28                 | .001            |
| Sex - Other/Female                   | 0.41            | 0.74               | [-1.04, 1.86]  | 0.56                 | .579            |
| Risk Perception                      | 0.02            | 0.04               | [-0.05, 0.10]  | 0.61                 | .542            |
| Narcissism Admiration                | -0.03           | 0.05               | [-0.13, 0.06]  | -0.70                | .485            |
| Narcissism Rivalry                   | 0.07            | 0.05               | [-0.04, 0.18]  | 1.32                 | .187            |
| Collective Narcissism                | 0.13            | 0.04               | [0.04, 0.21]   | 2.89                 | .004            |
| Conspiracy Beliefs                   | -0.22           | 0.04               | [-0.31, -0.14] | -5.23                | < .001          |
| National Identification              | 0.10            | 0.03               | [0.03, 0.17]   | 2.78                 | .006            |
| Moral Circle                         | 0.00            | 0.03               | [-0.06, 0.07]  | 0.10                 | .917            |
| Moral Identity Internalization       | 0.21            | 0.04               | [0.12, 0.29]   | 4.63                 | < .001          |
| Moral Identity Symbolization         | 0.06            | 0.04               | [-0.03, 0.14]  | 1.29                 | .199            |
| Political Ideology                   | -0.02           | 0.04               | [-0.10, 0.07]  | -0.34                | .732            |
| Moral Circle × Internalization       | -0.01           | 0.04               | [-0.08, 0.06]  | -0.34                | .735            |
| Moral Circle × Symbolization         | 0.00            | 0.04               | [-0.07, 0.07]  | 0.10                 | .924            |
| Internalization × Political Ideology | 0.03            | 0.04               | [-0.06, 0.11]  | 0.60                 | .550            |
| Symbolization × Political Ideology   | 0.05            | 0.04               | [-0.03, 0.13]  | 1.19                 | .233            |

*Note: Internalization = Moral Identity Internalization; Symbolization = Moral Identity Symbolization*

*Distancing Adherence***Table S11**

Model 5: Full regression model predicting adherence to Physical Distancing measures (without Country);  $R^2 = 0.36$ ,  $S.E. = 0.8$ , adjusted  $R^2 = 0.36$ ,  $F(17, 1932) = 64.68$ ,  $p < .001$ .

|                                      | <b><i>b</i></b> | <b><i>S.E.</i></b> | <b>95% CI</b>  | <b><i>t</i>(1932)</b> | <b><i>p</i></b> |
|--------------------------------------|-----------------|--------------------|----------------|-----------------------|-----------------|
| Intercept                            | -0.34           | 0.06               | [-0.47, -0.21] | -5.20                 | < .001          |
| Age                                  | 0.01            | 0.00               | [0.00, 0.01]   | 4.55                  | < .001          |
| Sex - Male/Female                    | 0.12            | 0.04               | [0.04, 0.19]   | 3.05                  | .002            |
| Sex - Other/Female                   | 0.22            | 0.36               | [-0.48, 0.93]  | 0.62                  | .535            |
| Risk Perception                      | 0.03            | 0.02               | [-0.01, 0.07]  | 1.50                  | .134            |
| Narcissism Admiration                | -0.01           | 0.03               | [-0.07, 0.04]  | -0.52                 | .600            |
| Narcissism Rivalry                   | -0.10           | 0.03               | [-0.15, -0.04] | -3.53                 | < .001          |
| Collective Narcissism                | 0.03            | 0.02               | [-0.02, 0.08]  | 1.12                  | .263            |
| Conspiracy Beliefs                   | -0.19           | 0.02               | [-0.24, -0.15] | -7.89                 | < .001          |
| National Identification              | 0.13            | 0.02               | [0.09, 0.18]   | 6.11                  | < .001          |
| Moral Circle                         | 0.03            | 0.02               | [-0.01, 0.06]  | 1.43                  | .154            |
| Moral Identity Internalization       | 0.34            | 0.02               | [0.29, 0.38]   | 14.02                 | < .001          |
| Moral Identity Symbolization         | 0.05            | 0.02               | [0.01, 0.10]   | 2.37                  | .018            |
| Political Ideology                   | -0.02           | 0.02               | [-0.06, 0.02]  | -0.85                 | .394            |
| Moral Circle × Internalization       | -0.02           | 0.02               | [-0.06, 0.02]  | -0.92                 | .357            |
| Moral Circle × Symbolization         | 0.04            | 0.02               | [0.01, 0.08]   | 2.44                  | .015            |
| Internalization × Political Ideology | -0.05           | 0.02               | [-0.09, -0.01] | -2.71                 | .007            |
| Symbolization × Political Ideology   | 0.06            | 0.02               | [0.02, 0.09]   | 3.35                  | .001            |

*Note: Internalization = Moral Identity Internalization; Symbolization = Moral Identity Symbolization*

**Table S12**

Model 6: Full model predicting adherence to Physical Distancing measures (with Country

included as a variable);  $R^2 = 0.42$ ,  $S.E. = 0.77$ , adjusted  $R^2 = 0.41$ ,  $F(35, 1914) = 38.94$ ,  $p < .001$ .

|                                         | <b>b</b> | <b>S.E.</b> | <b>95% CI</b>  | <b>t(1914)</b> | <b>p</b> |
|-----------------------------------------|----------|-------------|----------------|----------------|----------|
| Intercept                               | -0.53    | 0.08        | [-0.68, -0.38] | -6.89          | < .001   |
| Country                                 | 0.51     | 0.14        | [0.24, 0.77]   | 3.75           | < .001   |
| Age                                     | 0.01     | 0.00        | [0.00, 0.01]   | 4.61           | < .001   |
| Sex - Male/Female                       | 0.13     | 0.04        | [0.05, 0.22]   | 3.14           | .002     |
| Sex - Other/Female                      | 0.28     | 0.39        | [-0.48, 1.04]  | 0.72           | .472     |
| Risk Perception                         | 0.11     | 0.02        | [0.06, 0.15]   | 4.62           | < .001   |
| Narcissism Admiration                   | 0.01     | 0.03        | [-0.05, 0.07]  | 0.24           | .807     |
| Narcissism Rivalry                      | -0.11    | 0.03        | [-0.17, -0.05] | -3.62          | < .001   |
| Collective Narcissism                   | -0.02    | 0.03        | [-0.07, 0.04]  | -0.55          | .585     |
| Conspiracy Beliefs                      | -0.17    | 0.03        | [-0.23, -0.12] | -6.09          | < .001   |
| National Identification                 | 0.15     | 0.03        | [0.10, 0.20]   | 5.84           | < .001   |
| Moral Circle                            | 0.04     | 0.02        | [0.00, 0.08]   | 1.91           | .056     |
| Moral Identity Internalization          | 0.35     | 0.03        | [0.30, 0.41]   | 13.09          | < .001   |
| Moral Identity Symbolization            | 0.10     | 0.03        | [0.05, 0.15]   | 4.12           | < .001   |
| Political Ideology                      | -0.02    | 0.02        | [-0.07, 0.03]  | -0.90          | .371     |
| Moral Circle × Internalization          | -0.01    | 0.02        | [-0.05, 0.03]  | -0.49          | .625     |
| Moral Circle × Symbolization            | 0.04     | 0.02        | [0.00, 0.08]   | 2.10           | .036     |
| Internalization × Political Ideology    | -0.05    | 0.02        | [-0.09, -0.01] | -2.67          | .008     |
| Symbolization × Political Ideology      | 0.07     | 0.02        | [0.04, 0.11]   | 3.98           | < .001   |
| Country × Age                           | 0.00     | 0.00        | [-0.01, 0.00]  | -0.60          | .545     |
| Country × Sex - Male/Female             | 0.02     | 0.09        | [-0.15, 0.19]  | 0.23           | .821     |
| Country × Sex - Other/Female            | 0.52     | 0.88        | [-1.21, 2.25]  | 0.59           | .554     |
| Country × Risk Perception               | -0.15    | 0.05        | [-0.25, -0.06] | -3.14          | .002     |
| Country × Narcissism Admiration         | 0.00     | 0.06        | [-0.12, 0.12]  | 0.01           | .990     |
| Country × Narcissism Rivalry            | -0.06    | 0.07        | [-0.19, 0.07]  | -0.87          | .383     |
| Country × Collective Narcissism         | 0.06     | 0.06        | [-0.05, 0.16]  | 1.00           | .318     |
| Country × Conspiracy Beliefs            | 0.05     | 0.05        | [-0.05, 0.16]  | 0.95           | .343     |
| Country × National Identification       | -0.06    | 0.05        | [-0.14, 0.03]  | -1.23          | .220     |
| Country × Moral Circle                  | -0.05    | 0.04        | [-0.14, 0.03]  | -1.21          | .225     |
| Country × Internalization               | -0.08    | 0.05        | [-0.19, 0.02]  | -1.52          | .128     |
| Country × Symbolization                 | -0.18    | 0.05        | [-0.28, -0.07] | -3.35          | .001     |
| Country × Political Ideology            | 0.08     | 0.05        | [-0.02, 0.19]  | 1.56           | .119     |
| Country × M. Circle × Internalization   | -0.02    | 0.04        | [-0.10, 0.07]  | -0.38          | .708     |
| Country × M. Circle × Symbolization     | -0.03    | 0.04        | [-0.12, 0.05]  | -0.78          | .436     |
| Country × Internalization × P. Ideology | 0.11     | 0.05        | [0.01, 0.21]   | 2.06           | .039     |
| Country × Symbolization × P. Ideology   | -0.06    | 0.05        | [-0.15, 0.03]  | -1.26          | .209     |

*Note: Internalization = Moral Identity Internalization; Symbolization = Moral Identity Symbolization; M. Circle = Moral Circle; P. Ideology = Political Ideology*

**Figure S6**

The relationship between Political Ideology and Internalization in predicting Physical Distancing for the total sample.

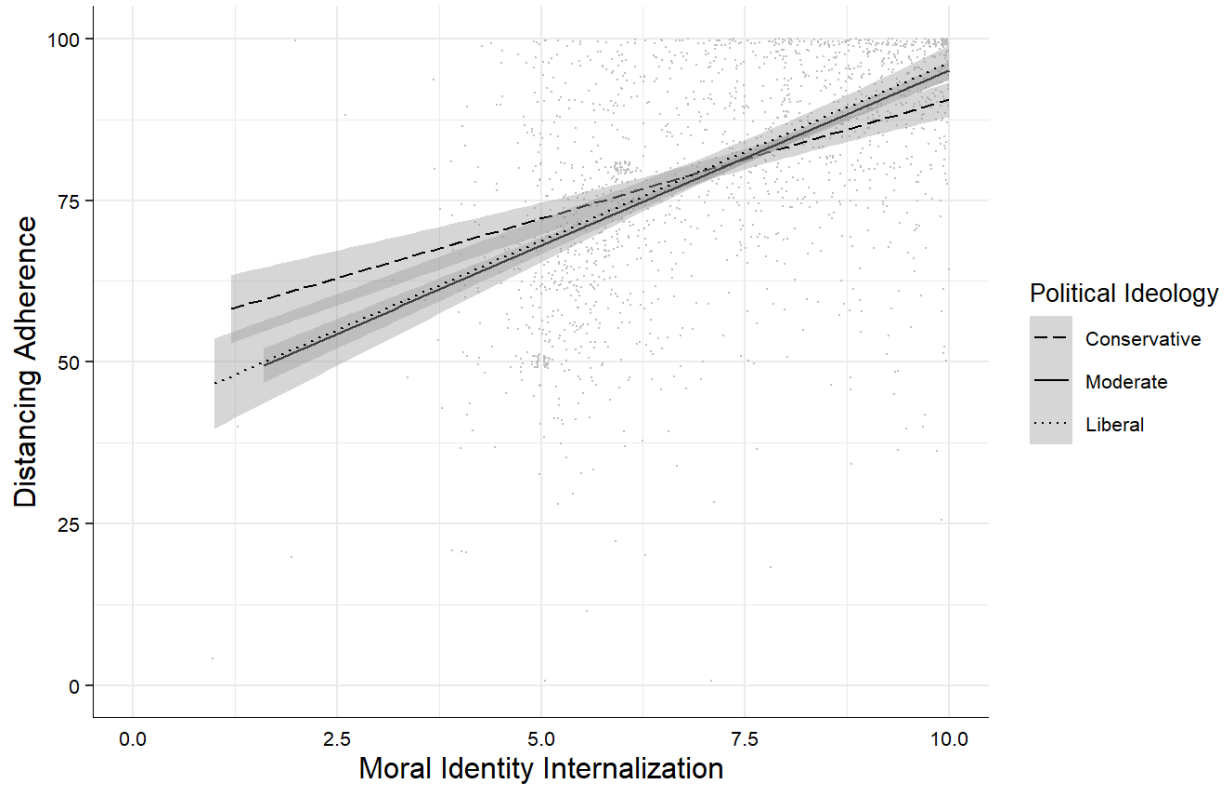

**Figure S7**

The relationship between Political Ideology and Internalization in predicting Physical Distancing for the total sample.

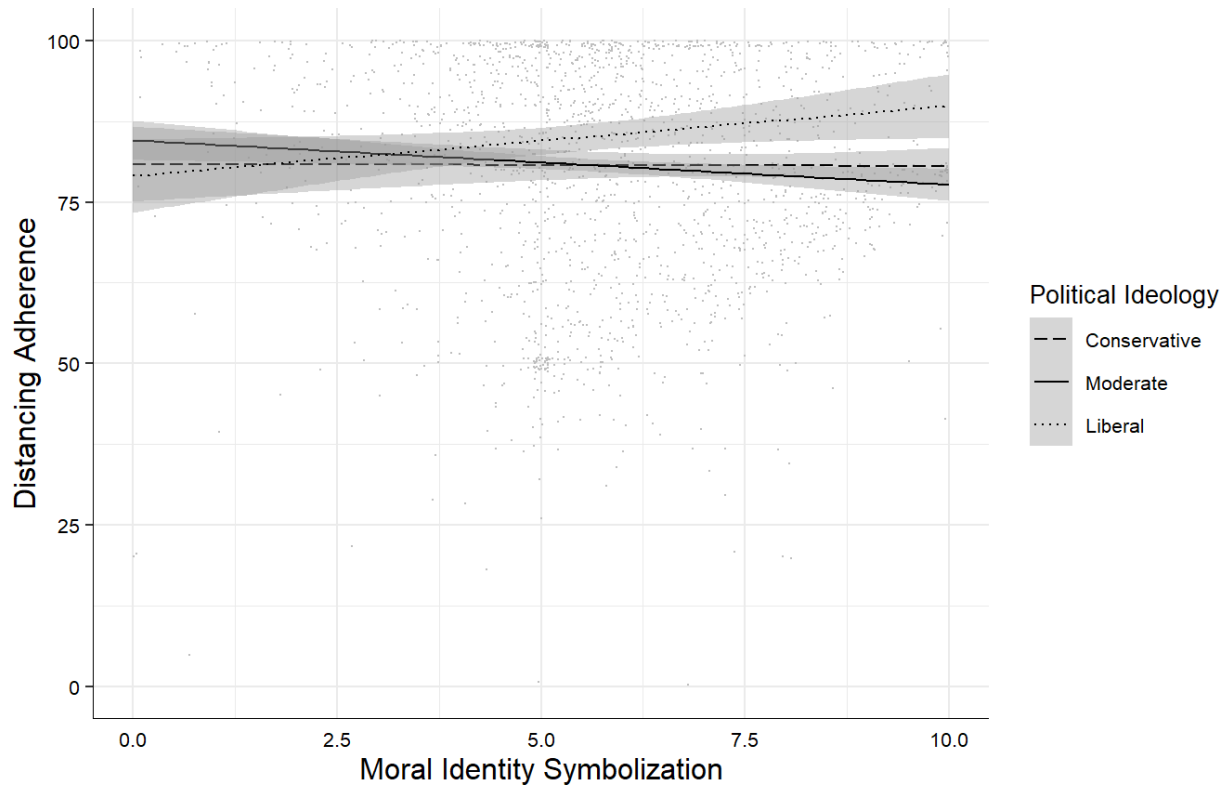

**Table S13**

Model 7: Predictors of Adherence to Physical Distancing measures in USA subsample;  $R^2 = 0.4$ ,  $S.E. = 0.8$ , adjusted  $R^2 = 0.39$ ,  $F(17, 1430) = 55.3$ ,  $p < .001$ .

|                                      | <b><i>b</i></b> | <b><i>S.E.</i></b> | <b>95% CI</b>  | <b><i>t</i>(1430)</b> | <b><i>p</i></b> |
|--------------------------------------|-----------------|--------------------|----------------|-----------------------|-----------------|
| Intercept                            | -0.53           | 0.08               | [-0.68, -0.37] | -6.66                 | < .001          |
| Age                                  | 0.01            | 0.00               | [0.00, 0.01]   | 4.46                  | < .001          |
| Sex - Male/Female                    | 0.13            | 0.04               | [0.05, 0.22]   | 3.03                  | .002            |
| Sex - Other/Female                   | 0.28            | 0.40               | [-0.51, 1.07]  | 0.70                  | .486            |
| Risk Perception                      | 0.11            | 0.02               | [0.06, 0.15]   | 4.47                  | < .001          |
| Narcissism Admiration                | 0.01            | 0.03               | [-0.05, 0.07]  | 0.24                  | .813            |
| Narcissism Rivalry                   | -0.11           | 0.03               | [-0.17, -0.05] | -3.50                 | < .001          |
| Collective Narcissism                | -0.02           | 0.03               | [-0.07, 0.04]  | -0.53                 | .598            |
| Conspiracy Beliefs                   | -0.17           | 0.03               | [-0.23, -0.11] | -5.89                 | < .001          |
| National Identification              | 0.15            | 0.03               | [0.10, 0.20]   | 5.64                  | < .001          |
| Moral Circle                         | 0.04            | 0.02               | [0.00, 0.08]   | 1.85                  | .065            |
| Moral Identity Internalization       | 0.35            | 0.03               | [0.30, 0.41]   | 12.66                 | < .001          |
| Moral Identity Symbolization         | 0.10            | 0.03               | [0.05, 0.16]   | 3.99                  | < .001          |
| Political Ideology                   | -0.02           | 0.03               | [-0.07, 0.03]  | -0.87                 | .387            |
| Moral Circle × Internalization       | -0.01           | 0.02               | [-0.05, 0.03]  | -0.47                 | .636            |
| Moral Circle × Symbolization         | 0.04            | 0.02               | [0.00, 0.08]   | 2.03                  | .043            |
| Internalization × Political Ideology | -0.05           | 0.02               | [-0.09, -0.01] | -2.59                 | .010            |
| Symbolization × Political Ideology   | 0.07            | 0.02               | [0.04, 0.11]   | 3.85                  | < .001          |

*Note: Internalization = Moral Identity Internalization; Symbolization = Moral Identity Symbolization*



**Table S14**

Model 8: Predictors of Adherence to Physical Distancing measures in New Zealand subsample;

$R^2 = 0.32$ ,  $S.E. = 0.69$ , adjusted  $R^2 = 0.3$ ,  $F(17, 484) = 13.4$ ,  $p < .001$ .

|                                      | <b><i>b</i></b> | <b><i>S.E.</i></b> | <b>95% CI</b>  | <b><i>t</i>(484)</b> | <b><i>p</i></b> |
|--------------------------------------|-----------------|--------------------|----------------|----------------------|-----------------|
| Intercept                            | -0.02           | 0.10               | [-0.22, 0.18]  | -0.21                | .837            |
| Age                                  | 0.01            | 0.00               | [0.00, 0.01]   | 2.72                 | .007            |
| Sex - Male/Female                    | 0.15            | 0.07               | [0.02, 0.28]   | 2.33                 | .020            |
| Sex - Other/Female                   | 0.80            | 0.71               | [-0.58, 2.19]  | 1.14                 | .256            |
| Risk Perception                      | -0.05           | 0.04               | [-0.12, 0.03]  | -1.22                | .223            |
| Narcissism Admiration                | 0.01            | 0.05               | [-0.09, 0.10]  | 0.17                 | .867            |
| Narcissism Rivalry                   | -0.17           | 0.05               | [-0.27, -0.06] | -3.21                | .001            |
| Collective Narcissism                | 0.04            | 0.04               | [-0.04, 0.12]  | 0.94                 | .349            |
| Conspiracy Beliefs                   | -0.12           | 0.04               | [-0.20, -0.04] | -2.96                | .003            |
| National Identification              | 0.09            | 0.03               | [0.03, 0.16]   | 2.81                 | .005            |
| Moral Circle                         | -0.01           | 0.03               | [-0.08, 0.05]  | -0.33                | .741            |
| Moral Identity Internalization       | 0.27            | 0.04               | [0.19, 0.35]   | 6.32                 | < .001          |
| Moral Identity Symbolization         | -0.07           | 0.04               | [-0.15, 0.01]  | -1.73                | .085            |
| Political Ideology                   | 0.06            | 0.04               | [-0.02, 0.14]  | 1.45                 | .148            |
| Moral Circle × Internalization       | -0.03           | 0.04               | [-0.10, 0.04]  | -0.77                | .444            |
| Moral Circle × Symbolization         | 0.01            | 0.03               | [-0.06, 0.07]  | 0.21                 | .831            |
| Internalization × Political Ideology | 0.05            | 0.04               | [-0.03, 0.14]  | 1.25                 | .213            |
| Symbolization × Political Ideology   | 0.01            | 0.04               | [-0.06, 0.09]  | 0.35                 | .726            |

*Note: Internalization = Moral Identity Internalization; Symbolization = Moral Identity Symbolization*

*Hygiene Adherence***Table S15**

Model 9: Full regression model predicting adherence to Physical Hygiene measures (without Country);  $R^2 = 0.27$ ,  $S.E. = 0.86$ , adjusted  $R^2 = 0.26$ ,  $F(17, 1931) = 41.61$ ,  $p < .001$ .

| predictor                            | <i>b</i> | <i>S.E.</i> | 95% CI         | <i>t</i> (1931) | <i>p</i> |
|--------------------------------------|----------|-------------|----------------|-----------------|----------|
| Intercept                            | -0.22    | 0.07        | [-0.36, -0.09] | -3.24           | .001     |
| Age                                  | 0.00     | 0.00        | [0.00, 0.01]   | 1.82            | .069     |
| Sex - Male/Female                    | 0.19     | 0.04        | [0.11, 0.27]   | 4.56            | < .001   |
| Sex - Other/Female                   | -0.47    | 0.39        | [-1.23, 0.28]  | -1.22           | .221     |
| Risk Perception                      | 0.13     | 0.02        | [0.08, 0.17]   | 5.78            | < .001   |
| Narcissism Admiration                | 0.10     | 0.03        | [0.05, 0.16]   | 3.66            | < .001   |
| Narcissism Rivalry                   | -0.12    | 0.03        | [-0.18, -0.06] | -4.00           | < .001   |
| Collective Narcissism                | 0.14     | 0.03        | [0.09, 0.19]   | 5.19            | < .001   |
| Conspiracy Beliefs                   | -0.08    | 0.03        | [-0.13, -0.02] | -2.89           | .004     |
| National Identification              | 0.13     | 0.02        | [0.09, 0.18]   | 5.73            | < .001   |
| Moral Circle                         | 0.01     | 0.02        | [-0.03, 0.05]  | 0.67            | .505     |
| Moral Identity Internalization       | 0.20     | 0.03        | [0.15, 0.25]   | 7.82            | < .001   |
| Moral Identity Symbolization         | 0.23     | 0.02        | [0.18, 0.28]   | 9.44            | < .001   |
| Political Ideology                   | 0.02     | 0.02        | [-0.02, 0.07]  | 1.04            | .300     |
| Moral Circle × Internalization       | 0.02     | 0.02        | [-0.02, 0.06]  | 1.02            | .306     |
| Moral Circle × Symbolization         | 0.01     | 0.02        | [-0.03, 0.05]  | 0.50            | .618     |
| Internalization × Political Ideology | -0.06    | 0.02        | [-0.10, -0.02] | -3.17           | .002     |
| Symbolization × Political Ideology   | 0.03     | 0.02        | [-0.01, 0.07]  | 1.68            | .094     |

*Note: Internalization = Moral Identity Internalization; Symbolization = Moral Identity Symbolization*

**Table S16**

Model 10: Full model predicting adherence to Physical Hygiene measures (with Country

included as a variable);  $R^2 = 0.28$ ,  $S.E. = 0.85$ , adjusted  $R^2 = 0.27$ ,  $F(35, 1913) = 21.76$ ,  $p < .001$ .

|                                         | <b>b</b> | <b>S.E.</b> | <b>95% CI</b>  | <b>t(1913)</b> | <b>p</b> |
|-----------------------------------------|----------|-------------|----------------|----------------|----------|
| Intercept                               | -0.25    | 0.12        | [-0.49, 0.00]  | -1.99          | .046     |
| Country                                 | 0.02     | 0.15        | [-0.27, 0.32]  | 0.17           | .869     |
| Age                                     | 0.00     | 0.00        | [-0.01, 0.00]  | -0.47          | .640     |
| Sex - Male/Female                       | 0.22     | 0.08        | [0.06, 0.38]   | 2.71           | .007     |
| Sex - Other/Female                      | -0.22    | 0.87        | [-1.93, 1.50]  | -0.25          | .804     |
| Risk Perception                         | -0.04    | 0.05        | [-0.13, 0.06]  | -0.76          | .446     |
| Narcissism Admiration                   | 0.06     | 0.06        | [-0.05, 0.18]  | 1.08           | .279     |
| Narcissism Rivalry                      | -0.12    | 0.06        | [-0.25, 0.01]  | -1.88          | .060     |
| Collective Narcissism                   | 0.15     | 0.05        | [0.05, 0.25]   | 2.92           | .004     |
| Conspiracy Beliefs                      | -0.01    | 0.05        | [-0.11, 0.09]  | -0.17          | .861     |
| National Identification                 | 0.06     | 0.04        | [-0.02, 0.14]  | 1.52           | .128     |
| Moral Circle                            | 0.01     | 0.04        | [-0.07, 0.09]  | 0.15           | .879     |
| Moral Identity Internalization          | 0.09     | 0.05        | [-0.01, 0.20]  | 1.79           | .074     |
| Moral Identity Symbolization            | 0.22     | 0.05        | [0.12, 0.32]   | 4.37           | < .001   |
| Political Ideology                      | 0.02     | 0.05        | [-0.08, 0.12]  | 0.36           | .719     |
| Moral Circle × Internalization          | 0.00     | 0.04        | [-0.09, 0.08]  | -0.01          | .991     |
| Moral Circle × Symbolization            | -0.07    | 0.04        | [-0.15, 0.02]  | -1.58          | .114     |
| Internalization × Political Ideology    | -0.12    | 0.05        | [-0.22, -0.02] | -2.28          | .023     |
| Symbolization × Political Ideology      | -0.01    | 0.05        | [-0.10, 0.09]  | -0.11          | .914     |
| Country × Age                           | 0.00     | 0.00        | [0.00, 0.01]   | 1.50           | .133     |
| Country × Sex - Male/Female             | -0.03    | 0.09        | [-0.22, 0.15]  | -0.33          | .739     |
| Country × Sex - Other/Female            | -0.39    | 0.97        | [-2.30, 1.52]  | -0.40          | .688     |
| Country × Risk perception               | 0.18     | 0.05        | [0.07, 0.28]   | 3.28           | .001     |
| Country × Narcissism admiration         | 0.04     | 0.07        | [-0.09, 0.17]  | 0.60           | .547     |
| Country × Narcissism rivalry            | 0.01     | 0.07        | [-0.13, 0.15]  | 0.16           | .871     |
| Country × Collective narcissism         | -0.01    | 0.06        | [-0.13, 0.11]  | -0.12          | .901     |
| Country × Conspiracy                    | -0.09    | 0.06        | [-0.20, 0.03]  | -1.44          | .151     |
| Country × National Identification       | 0.10     | 0.05        | [0.00, 0.20]   | 1.98           | .048     |
| Country × Moral Circle                  | 0.00     | 0.05        | [-0.09, 0.09]  | 0.04           | .965     |
| Country × Internalization               | 0.13     | 0.06        | [0.01, 0.25]   | 2.09           | .037     |
| Country × Symbolization                 | -0.01    | 0.06        | [-0.12, 0.11]  | -0.10          | .923     |
| Country × Political Ideology            | -0.01    | 0.06        | [-0.12, 0.11]  | -0.14          | .891     |
| Country × M. Circle × Internalization   | 0.03     | 0.05        | [-0.07, 0.12]  | 0.52           | .602     |
| Country × M. Circle × Symbolization     | 0.09     | 0.05        | [0.00, 0.18]   | 1.89           | .058     |
| Country × Internalization × P. Ideology | 0.06     | 0.06        | [-0.06, 0.17]  | 0.98           | .327     |
| Country × Symbolization × P. Ideology   | 0.04     | 0.05        | [-0.06, 0.14]  | 0.71           | .476     |

*Note: Internalization = Moral Identity Internalization; Symbolization = Moral Identity Symbolization; M. Circle = Moral Circle; P. Ideology = Political Ideology*

**Figure S8**

The relationship between Political Ideology and Internalization predicting Physical Hygiene for the total sample.

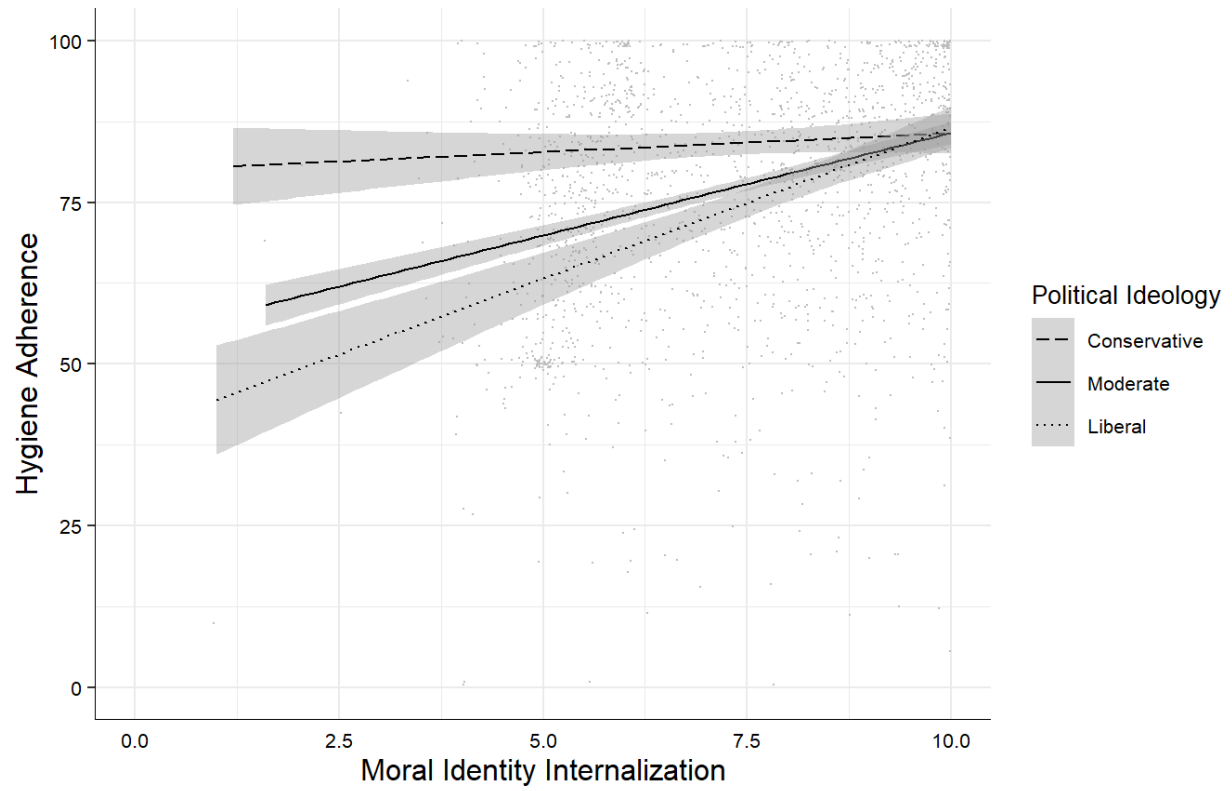

**Figure S9**

The relationship between Political Ideology and Moral Identity Symbolization in predicting Physical Hygiene for the total sample.

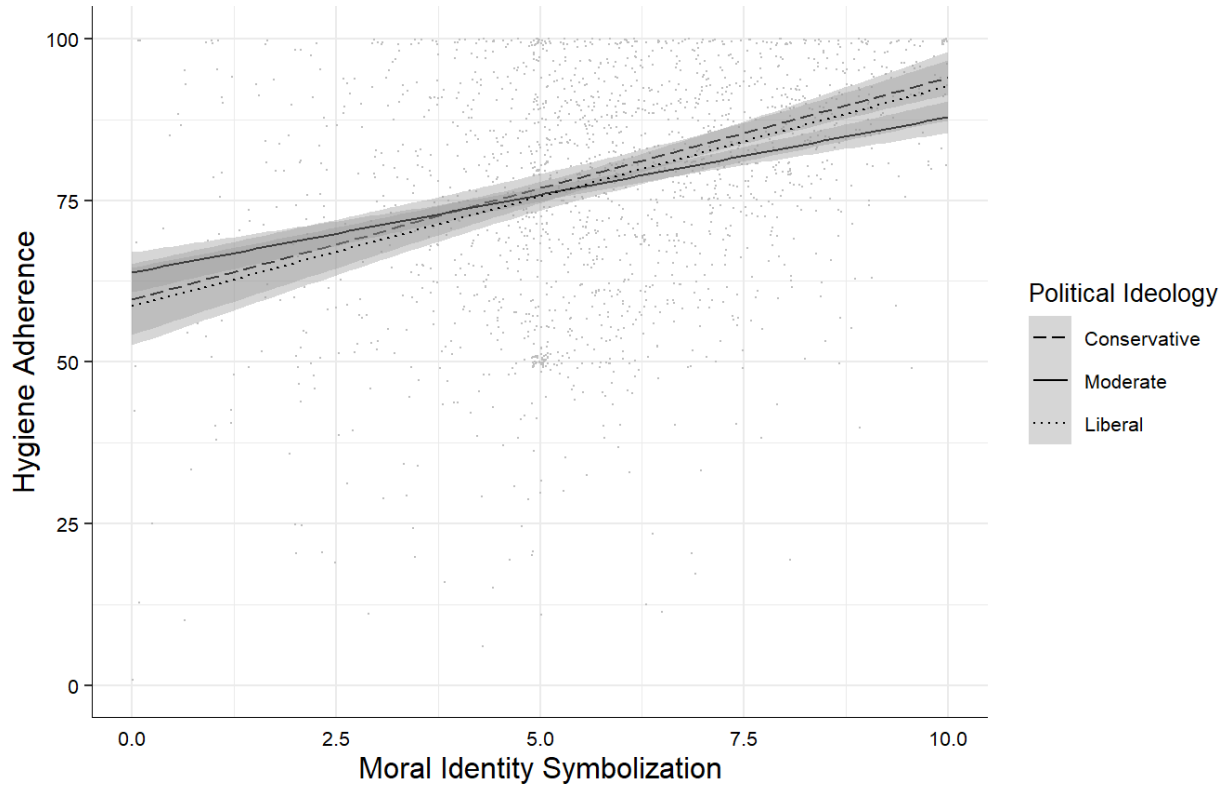

**Table S17**

Model 11: Predictors of Adherence to Physical Hygiene measures in USA subsample;  $R^2 = 0.31$ ,  $S.E. = 0.83$ , adjusted  $R^2 = 0.3$ ,  $F(17, 1429) = 37.46$ ,  $p < .001$ .

|                                      | <b><i>b</i></b> | <b><i>S.E.</i></b> | <b>95% CI</b>  | <b><i>t</i>(1429)</b> | <b><i>p</i></b> |
|--------------------------------------|-----------------|--------------------|----------------|-----------------------|-----------------|
| Intercept                            | -0.22           | 0.08               | [-0.38, -0.06] | -2.67                 | .008            |
| Age                                  | 0.00            | 0.00               | [0.00, 0.01]   | 2.02                  | .044            |
| Sex - Male/Female                    | 0.19            | 0.05               | [0.10, 0.28]   | 4.10                  | < .001          |
| Sex - Other/Female                   | -0.61           | 0.42               | [-1.43, 0.22]  | -1.45                 | .148            |
| Risk Perception                      | 0.14            | 0.02               | [0.09, 0.19]   | 5.63                  | < .001          |
| Narcissism Admiration                | 0.10            | 0.03               | [0.04, 0.17]   | 3.28                  | .001            |
| Narcissism Rivalry                   | -0.11           | 0.03               | [-0.17, -0.05] | -3.34                 | .001            |
| Collective Narcissism                | 0.14            | 0.03               | [0.08, 0.21]   | 4.64                  | < .001          |
| Conspiracy Beliefs                   | -0.09           | 0.03               | [-0.15, -0.03] | -3.09                 | .002            |
| National Identification              | 0.16            | 0.03               | [0.11, 0.22]   | 5.85                  | < .001          |
| Moral Circle                         | 0.01            | 0.02               | [-0.04, 0.05]  | 0.36                  | .721            |
| Moral Identity Internalization       | 0.22            | 0.03               | [0.16, 0.28]   | 7.58                  | < .001          |
| Moral Identity Symbolization         | 0.22            | 0.03               | [0.16, 0.27]   | 7.84                  | < .001          |
| Political Ideology                   | 0.01            | 0.03               | [-0.04, 0.06]  | 0.41                  | .685            |
| Moral Circle × Internalization       | 0.03            | 0.02               | [-0.02, 0.07]  | 1.12                  | .264            |
| Moral Circle × Symbolization         | 0.02            | 0.02               | [-0.02, 0.06]  | 1.09                  | .276            |
| Internalization × Political Ideology | -0.06           | 0.02               | [-0.11, -0.02] | -2.95                 | .003            |
| Symbolization × Political Ideology   | 0.03            | 0.02               | [-0.01, 0.07]  | 1.62                  | .106            |

*Note: Internalization = Moral Identity Internalization; Symbolization = Moral Identity Symbolization*

**Table S18**

Model 12: Predictors of Adherence to Physical Hygiene measures in New Zealand subsample;  $R^2 = 0.17$ ,  $S.E. = 0.9$ , adjusted  $R^2 = 0.14$ ,  $F(17, 484) = 5.93$ ,  $p < .001$ .

|                                      | <b><i>b</i></b> | <b><i>S.E.</i></b> | <b>95% CI</b>  | <b><i>t</i>(484)</b> | <b><i>p</i></b> |
|--------------------------------------|-----------------|--------------------|----------------|----------------------|-----------------|
| Intercept                            | -0.25           | 0.13               | [-0.50, 0.01]  | -1.88                | .061            |
| Age                                  | 0.00            | 0.00               | [-0.01, 0.00]  | -0.44                | .660            |
| Sex - Male/Female                    | 0.22            | 0.09               | [0.05, 0.39]   | 2.55                 | .011            |
| Sex - Other/Female                   | -0.22           | 0.93               | [-2.04, 1.60]  | -0.23                | .815            |
| Risk Perception                      | -0.04           | 0.05               | [-0.14, 0.06]  | -0.72                | .472            |
| Narcissism Admiration                | 0.06            | 0.06               | [-0.06, 0.19]  | 1.02                 | .308            |
| Narcissism Rivalry                   | -0.12           | 0.07               | [-0.26, 0.01]  | -1.77                | .077            |
| Collective Narcissism                | 0.15            | 0.06               | [0.04, 0.26]   | 2.75                 | .006            |
| Conspiracy Beliefs                   | -0.01           | 0.05               | [-0.11, 0.10]  | -0.16                | .869            |
| National Identification              | 0.06            | 0.04               | [-0.02, 0.15]  | 1.43                 | .152            |
| Moral Circle                         | 0.01            | 0.04               | [-0.08, 0.09]  | 0.14                 | .886            |
| Moral Identity Internalization       | 0.09            | 0.06               | [-0.02, 0.20]  | 1.68                 | .093            |
| Moral Identity Symbolization         | 0.22            | 0.05               | [0.12, 0.33]   | 4.12                 | < .001          |
| Political Ideology                   | 0.02            | 0.06               | [-0.09, 0.13]  | 0.34                 | .734            |
| Moral Circle × Internalization       | 0.00            | 0.05               | [-0.09, 0.09]  | -0.01                | .992            |
| Moral Circle × Symbolization         | -0.07           | 0.04               | [-0.15, 0.02]  | -1.49                | .137            |
| Internalization × Political Ideology | -0.12           | 0.06               | [-0.23, -0.01] | -2.15                | .032            |
| Symbolization × Political Ideology   | -0.01           | 0.05               | [-0.10, 0.09]  | -0.10                | .919            |

*Note: Internalization = Moral Identity Internalization; Symbolization = Moral Identity Symbolization*

**Table S19**

Summary of support for hypotheses for each measure

| Predictor |                                                | Restrictions<br>Support | Distancing<br>Adherence | Hygiene<br>Adherence |
|-----------|------------------------------------------------|-------------------------|-------------------------|----------------------|
| H1a       | Internalization                                | ✓                       | ✓                       | ✓                    |
|           | USA: internalization                           | ✓                       | ✓                       | ✓                    |
|           | NZL: internalization                           | ✓                       | ✓                       | ✗                    |
| H1b       | Symbolization                                  | ✓                       | ✓                       | ✓                    |
|           | USA: symbolization                             | ✓                       | ✓                       | ✓                    |
|           | NZL: symbolization                             | ✗                       | ✗                       | ✓                    |
| H2a       | Country × internalization × political ideology | ✓                       | ✓                       | ✗                    |
| H2b       | Country × symbolization × political ideology   | ✗                       | ✗                       | ✗                    |
| H3a       | USA: internalization × political ideology      | ✓                       | ✓                       | ✓                    |
| H3b       | USA: symbolization × political ideology        | ✓                       | ✓                       | ✗                    |
| H4a       | NZL: no internalization × political ideology   | ✓                       | ✓                       | ✗                    |
| H4b       | NZL: no symbolization × political ideology     | ✓                       | ✓                       | ✓                    |



## Analysis of Opposition to Mitigation Measures

### *Restrictions Support*

A multinomial logistic regression was conducted to test the predictors of opposition to restrictions. Overall, the model was significant,  $\chi^2(6, N = 1971) = 132.51, p < .001$ , and explained between 6.52% (Cox and Snell  $R^2$ ) and 13.9% (Nadelkerke  $R^2$ ) of the variance in responses.

**Table S20**

Predictors of opposition to restrictions

|                            | <i>B</i> | <i>SE</i> | <b>Wald</b> | <i>p</i> | <i>OR</i> | <b>2.5%</b> | <b>97.5%</b> |
|----------------------------|----------|-----------|-------------|----------|-----------|-------------|--------------|
| (Intercept)                | 1.66     | 0.92      | 1.81        | .070     | 5.28      | 0.90        | 33.07        |
| Country: USA               | 1.24     | 0.26      | 4.84        | < .001** | 3.45      | 2.14        | 5.86         |
| Internalization            | -0.07    | 0.01      | -5.73       | < .001** | 0.93      | 0.91        | 0.96         |
| Symbolization              | -0.02    | 0.01      | -1.74       | .081     | 0.98      | 0.96        | 1.00         |
| Political Ideology         | -0.38    | 0.13      | -2.91       | .004*    | 0.68      | 0.53        | 0.88         |
| Internalization × Ideology | 0.01     | 0.00      | 5.12        | < .001** | 1.01      | 1.01        | 1.01         |
| Symbolization × Ideology   | 0.00     | 0.00      | -0.95       | .340     | 1.00      | 1.00        | 1.00         |

*Note.* \* = sig. at  $p < .05$ ; \*\* = sig. at  $p < .001$

**Figure S10**

Interaction between Political Ideology and Moral Identity Internalization in predicting opposition to restrictions

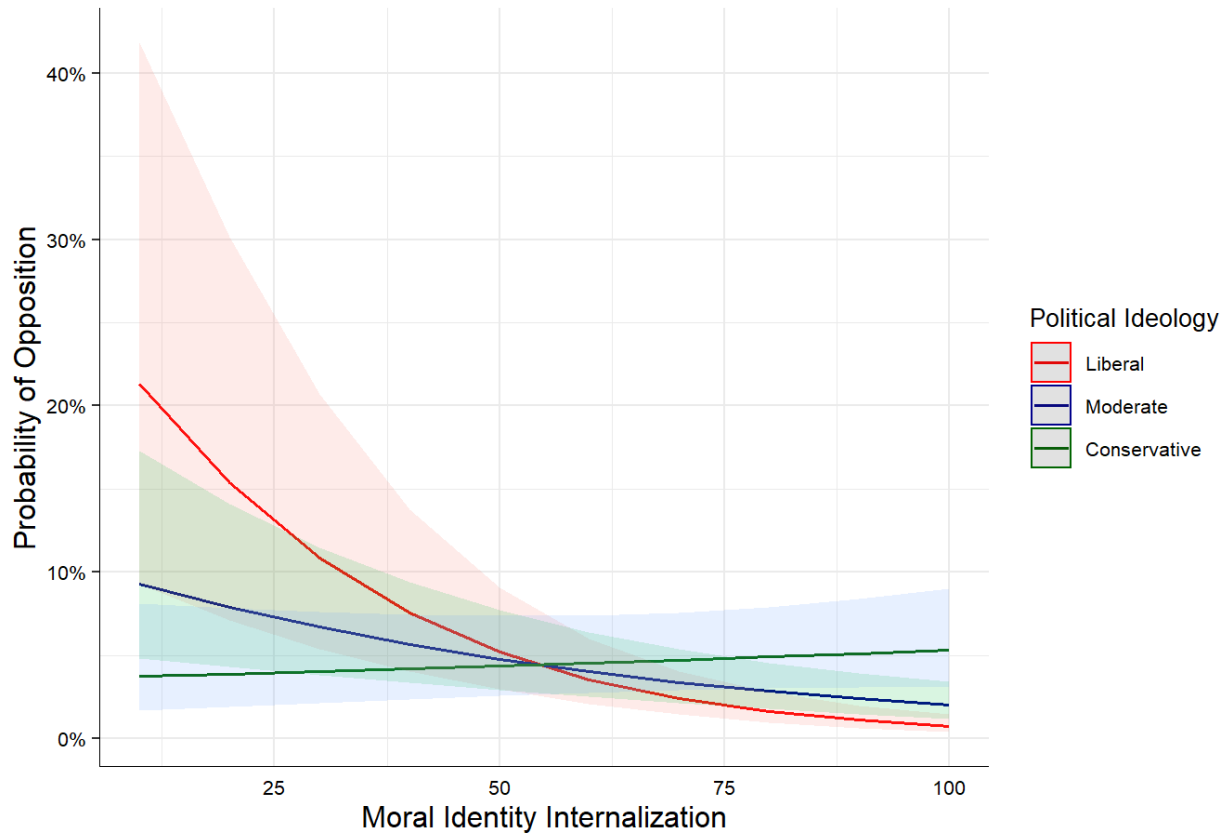

***Physical Contact Measures***

A multinomial logistic regression was conducted to test the predictors of opposition to physical contact measures. Overall the model was significant,  $\chi^2(6, N = 1971) = 78.19, p < .001$ , and explained between 3.9% (Cox and Snell  $R^2$ ) and 13.11% (Nadelkerke  $R^2$ ) of the variance in responses.

**Table S21**

Predictors of opposition to physical contact measures

|                            | <b><i>B</i></b> | <b><i>SE</i></b> | <b><i>Wald</i></b> | <b><i>p</i></b> | <b><i>OR</i></b> | <b><i>2.5%</i></b> | <b><i>97.5%</i></b> |
|----------------------------|-----------------|------------------|--------------------|-----------------|------------------|--------------------|---------------------|
| (Intercept)                | 1.07            | 1.09             | 0.98               | .327            | 2.92             | 0.35               | 26.41               |
| Country: USA               | 1.07            | 0.36             | 2.94               | .003*           | 2.92             | 1.50               | 6.38                |
| Internalization            | -0.07           | 0.02             | -4.32              | < .001**        | 0.93             | 0.90               | 0.96                |
| Symbolization              | 0.00            | 0.01             | -0.28              | .778            | 1.00             | 0.97               | 1.02                |
| Political Ideology         | -0.20           | 0.16             | -1.20              | .229            | 0.82             | 0.59               | 1.13                |
| Internalization × Ideology | 0.00            | 0.00             | 1.87               | .062            | 1.00             | 1.00               | 1.01                |
| Symbolization × Ideology   | 0.00            | 0.00             | -1.06              | .291            | 1.00             | 0.99               | 1.00                |

*Note.* \* = sig. at  $p < .05$ ; \*\* = sig. at  $p < .001$

***Physical Hygiene Measures***

A multinomial logistic regression was conducted to test the predictors of opposition to physical hygiene measures. Overall the model was significant,  $\chi^2(6, N = 1971) = 98.85, p < .001$ , and explained between 4.91% (Cox and Snell  $R^2$ ) and 13.85% (Nadelkerke  $R^2$ ) of the variance in responses.

**Table S22**

Predictors of opposition to physical hygiene measures

|                            | <i>B</i> | <i>SE</i> | <b>Wald</b> | <i>p</i> | <i>OR</i> | <b>2.5%</b> | <b>97.5%</b> |
|----------------------------|----------|-----------|-------------|----------|-----------|-------------|--------------|
| (Intercept)                | 2.36     | 0.96      | 2.45        | .014*    | 10.58     | 1.66        | 74.65        |
| Country: USA               | -0.21    | 0.22      | -0.94       | .348     | 0.81      | 0.53        | 1.26         |
| Internalization            | -0.05    | 0.01      | -3.81       | < .001** | 0.95      | 0.93        | 0.98         |
| Symbolization              | -0.03    | 0.01      | -2.79       | .005*    | 0.97      | 0.95        | 0.99         |
| Political Ideology         | -0.29    | 0.16      | -1.88       | .061     | 0.75      | 0.55        | 1.01         |
| Internalization × Ideology | 0.01     | 0.00      | 2.64        | .008*    | 1.01      | 1.00        | 1.01         |
| Symbolization × Ideology   | 0.00     | 0.00      | -0.75       | .451     | 1.00      | 1.00        | 1.00         |

*Note.* \* = sig. at  $p < .05$ ; \*\* = sig. at  $p < .001$

**Figure S11**

Interaction between Political Ideology and Moral Identity Internalization in predicting opposition to hygiene measures

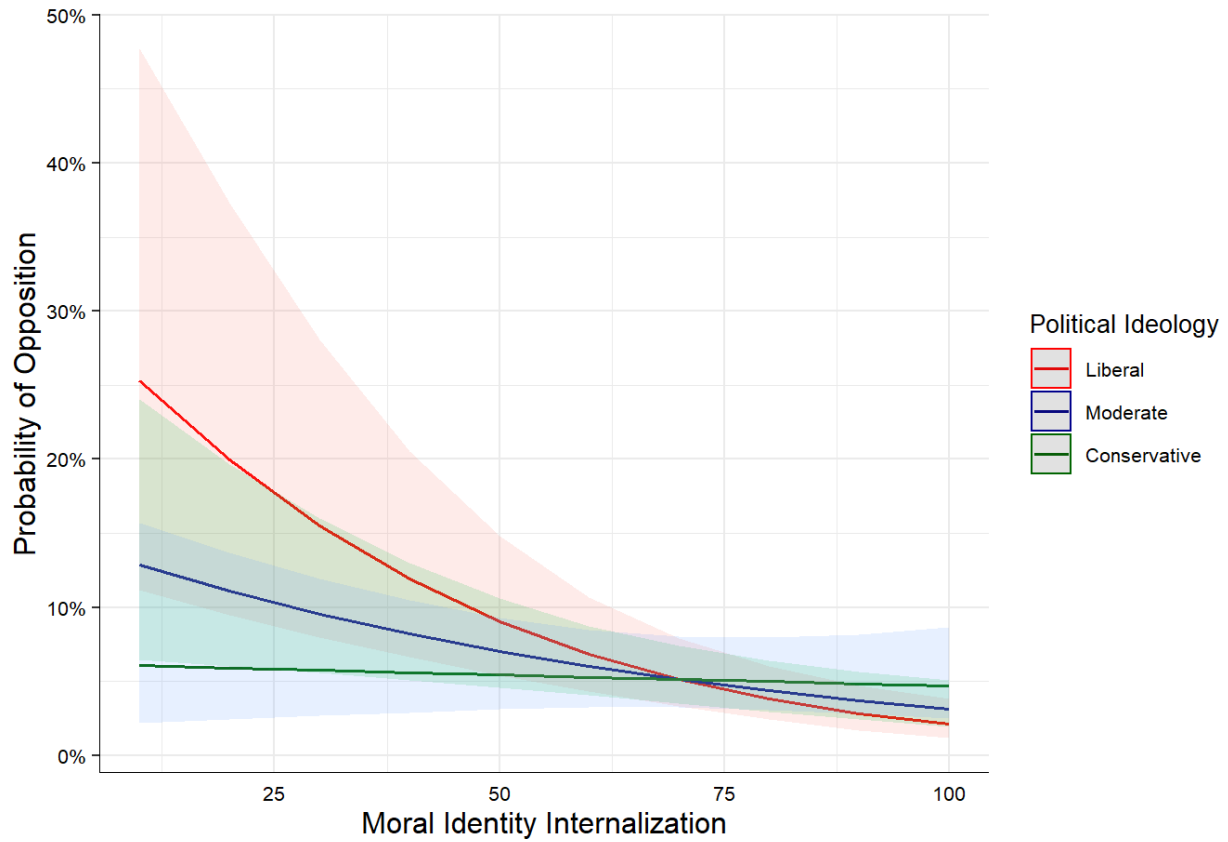

Supplement: POPS-9999-0-s001.pdf [file POPS-9999-0-s001.pdf]
